1 **Virome-wide serological profiling reveals association of herpesviruses with**  
2 **obesity**

3  
4 Mohammad Rubayet Hasan<sup>2,4##</sup>, Mahbuba Rahman<sup>1#</sup>, Taushif Khan<sup>1#</sup>, Amira Saeed<sup>2</sup>,  
5 Sathyavathi Sundaraju<sup>2</sup>, Annaliza Flores<sup>1</sup>, Philip Hawken<sup>2</sup>, Arun Rawat<sup>1</sup>, Naser Elkum<sup>1</sup>,  
6 Khalid Hussain<sup>1,4</sup>, Rusung Tan<sup>2,4</sup>, Patrick Tang<sup>2,4</sup>, Nico Marr<sup>1,5</sup>

7  
8 <sup>1</sup>Department of Research, <sup>2</sup>Department of Pathology, <sup>3</sup>Division of Endocrinology,  
9 Department of Pediatrics, Sidra Medicine, Doha, Qatar

10 <sup>4</sup>Weill-Cornell Medical College, Doha, Qatar

11 <sup>5</sup>College of Health and Life Sciences, Hamad Bin Khalifa University, Doha, Qatar

12

13 **Running title:** Association of herpesviruses with obesity

14 **Keywords:** Obesity, seroprevalence, herpesviruses, herpes simplex virus, picornaviruses

15

16 **\*Corresponding author**

17 Mohammad Rubayet Hasan, PhD, FCCM, D(ABMM)

18 Assistant Professor of Clinical Pathology and Laboratory Medicine

19 Weill Cornell Medical College in Qatar (WCMC-Q)

20 Clinical Molecular Microbiologist, Department of Pathology

21 Sidra Medicine, Office no: H2M-24093, PO Box 26999, Doha, Qatar

22 Direct: +974 4003 2996; Mobile: +974 3003 5501

23 mhasan@sidra.org / <http://www.sidra.org/doctors/mohammad-rubayet-hasan/>

24

25 ORCID ID: 0000-0002-4658-7949

26 **Abstract**

27 The relationship between viral infection and obesity has been known for several decades but  
28 epidemiological data related to obesity is limited to only a few viral pathogens. To identify  
29 associations between viral infections and obesity, a high-throughput virome-wide serological  
30 profiling tool, VirScan, was used to measure antibody responses to a wide range of viruses.  
31 Serum specimens from 457 Qatari adults (lean=184;obese=273) and 231 Qatari children  
32 (lean=111;obese=120) were assessed by VirScan. Pediatric specimens were simultaneously  
33 tested by conventional serology for several herpesviruses to validate VirScan results. Viral  
34 association with obesity was determined by calculation of odds ratio (OR) and *p*-values from  
35 Fisher test, and by multivariate regression analysis to adjust for age and gender, with  
36 Bonferroni correction for multiple testing. Comprehensive serological profiling of Qatari  
37 adult population with VirScan revealed positive and negative associations ( $p < 0.05$ ) of  
38 antibody responses to members of Herpesviridae and Picornaviridae families, respectively,  
39 with obesity. After adjusting *p*-values for multiple comparisons, only herpes simplex virus 1  
40 (HSV-1) and Rhinovirus A were positively (OR=3.3; 95%CI 2.15-4.99;  $p=2.787E-08$ ) and  
41 negatively (OR=0.4; 95%CI 0.26-0.65;  $p=1.175E-03$ ) associated with obesity. At the peptide  
42 level, higher prevalence of antibodies against several peptide epitopes of HSV-1/2 was  
43 positively (OR=2.35-3.82;  $p \leq 3.981E-05$ ) associated with obesity. No such associations were  
44 seen at the species or peptide levels in the pediatric population. By multivariate regression  
45 analysis, HSV-1 was independently associated with obesity irrespective of age and gender.  
46 These findings are in agreement with limited data on the adipogenic properties of HSV-1  
47 observed in vitro.

48

49 **Importance:** The state of Qatar has one of the highest rates of obesity and associated  
50 morbidities in the world. Although obesity is predominantly caused by the intake of high

51 calorie diet and reduced physical activities, other factors including infections with certain  
52 viruses have been reported. Among these viruses, human adenoviruses were widely studied  
53 but epidemiological data for other viruses in relation to human obesity are limited. Here, we  
54 studied the association of obesity in Qatari adults and children with a wide range of viral  
55 pathogens using VirScan, a virome-wide serological profiling tool. Our results indicate  
56 significant association HSV-1 with obesity in the adult population only. Furthermore, we  
57 have identified a set of HSV peptides as candidate obesogenic factors for future studies.

58

59

60

61

62

63

64

65

66

67

68

69

70

71

72

73

74

75

76

## 77 **Introduction**

78         The increasing prevalence of obesity has led to an increased prevalence of many  
79 chronic diseases including diabetes, heart disease, cancer and mental health conditions. A  
80 recent Global Burden of Disease (GBD) study revealed that high BMI accounts for 4 million  
81 deaths worldwide, 60% of which occurred among obese persons. Leading causes of death and  
82 disability related to high BMI include cardiovascular disease, diabetes, chronic kidney  
83 disease, cancer and musculoskeletal disorders (1-3). The rate of obesity in Qatar is one of the  
84 highest in the world. Based on the recent data published by the Qatar Biobank, 48% of Qatari  
85 men and 40% of Qatari women are obese. The high rate of obesity is also correlated with the  
86 fact that 44% of all participants have elevated cholesterol and 15.5% had previously been  
87 diagnosed with diabetes mellitus (4, 5). Although the ‘energy imbalance’ arising from  
88 increased consumption of high calorie diets and a concomitant decrease in energy  
89 expenditure due to a sedentary lifestyle is considered to be the most important cause of  
90 obesity, there are suggestions for many other contributing factors, including infectious causes  
91 (6). Evidence for infectious causes of obesity came from epidemiological links and the  
92 observation of experimental lab animals that gained body fat following infection with certain  
93 infectious agents (7).

94         The association between infection and obesity has been known for more than three  
95 decades and has led to the term “infectobesity” (8). To date, several viruses including  
96 adenoviruses (Adv), cytomegalovirus (CMV), herpes simplex virus 1 (HSV-1), human herpes  
97 virus 8 (HHV-8), hepatitis C virus (HCV), canine distemper virus (CDV), rous-associated  
98 virus-7 (RAV-7) and borna disease virus (BDV) have been reported to cause obesity in  
99 animals. However, epidemiological data to link infection with human cases of obesity was  
100 mostly limited to adenoviruses. Among different serotypes of adenoviruses, evidence for

101 adipogenesis, based on results from laboratory, animal or epidemiologic investigations, exists  
102 for Adv-5, Adv-9, Adv-31, Adv-36 and Adv-37 (7, 9-12).

103 Despite high rates of obesity, no data on infectious causes of obesity is yet available  
104 for Qatar. While there are few reports on adenoviral infections implicated in respiratory and  
105 gastrointestinal infections, their serotypes remained unknown and none were studied in  
106 relation to obesity (13, 14). Apart from adenoviruses, laboratory and animal data suggest that  
107 other viruses may also be epidemiologically linked to human obesity. Furthermore, many  
108 other adipogenic and/or obesogenic viruses likely have not been identified yet because of the  
109 fact that seroepidemiological studies in relation to obesity were focused on specific viruses  
110 only. Studies investigating the association between adenoviruses and obesity so far were  
111 reliant on methods such as ELISA or serum neutralization assays to detect antibodies against  
112 specific viruses or on PCR methods to detect adenovirus DNA in adipose tissues (7, 15). A  
113 comprehensive seroepidemiological study may reveal the history of infection of an individual  
114 for a wide-range of pathogens and its association with the onset of obesity.

115 ‘VirScan’ first described by Xu *et al.* (16) is a revolutionary new technique for the  
116 comprehensive serologic profiling of the human population, and can reveal the history of  
117 infections in humans. The technique is based on phage immunoprecipitation sequencing  
118 (PhIP-seq) technology that uses a bacteriophage library that displays proteome-wide peptides  
119 from a large number of human-pathogenic viruses (16). The expanded VirScan library  
120 contains approximately 115,753 56-mer peptides representing most known pathogenic,  
121 human viruses (~400 species and strains) as well as other non-viral antigens retrieved from  
122 National Institute of Allergy and Infectious Diseases (NIAID) Immune Epitope Database  
123 ([www.iedb.org](http://www.iedb.org)) (17). To perform the serological screening, serum samples are mixed with  
124 the library allowing antibodies to bind with pathogen specific epitopes displayed on the  
125 phage surface. The bacteriophage-antibody complexes are then immunoprecipitated and the

126 phage DNA region encoding the artificially expressed peptide antigens to which an antibody  
127 was bound are sequenced by NGS to reveal the repertoire of anti-viral antibodies in a given  
128 serum sample. With its ability to correctly detect frequently encountered anti-viral antibodies  
129 and higher sensitivity and specificity ( $\geq 95\%$ ) with reference to standard ELISA and Western  
130 blot assays, VirScan has become a powerful new technique for high-throughput serological  
131 screening (16, 18). In this study, we employed VirScan to compare the antiviral antibody  
132 repertoires in the Qatari obese and lean population with the aim to test for associations  
133 between obesity and antiviral antibody responses at the species and peptide epitope levels.

134

## 135 **Results**

### 136 **Participant characteristics**

137 Serum specimens from two independent cohorts comprised of mostly Qatari nationals  
138 were assessed. The adult cohort includes a total of 457 subjects selected from 800 individuals  
139 based on BMI (WHO classification criteria; lean =  $\text{BMI} \leq 25$ ; obese =  $\text{BMI} \geq 30$ ) (Table 1).  
140 These individuals represent general Qatari population who volunteered to contribute to Qatar  
141 Biobank (QBB) - a national repository of biological specimens and health information in  
142 Qatar established to facilitate medical research on prevalent health issues (5). Average age of  
143 lean and obese subjects in the adult cohort were  $33.5 \pm 12.1$  and  $44.7 \pm 11.9$  years, respectively.  
144 Within the lean and obese groups 72.3 % and 71.8 % subjects were females, respectively.  
145 Pediatric cohort includes 231 subjects who were classified as lean (BMI 5<sup>th</sup> to <85<sup>th</sup>  
146 percentile) or obese (BMI  $\geq 95^{\text{th}}$  percentile) according to the definitions of Center for Disease  
147 Control and Prevention (CDC). Average age of lean and obese subjects in this cohort were  
148  $11.2 \pm 2.4$  years and  $12.1 \pm 2$  years, respectively. Within the lean and obese groups 58.6% and  
149 43.3% subjects were females, respectively.

150

151

152

### 153 **Enrichment profile of virome-wide peptide epitopes in obese versus lean population**

154        PhIPseq data from a total of 688 specimens were analyzed. NGS read counts mapped  
155 to 115,753 peptide sequences in the VirScan library were assessed against peptide counts in  
156 the input library. On an average  $586.2 \pm 190.4$  and  $756.1 \pm 182.9$  peptides are enriched ( $-\log p$ -  
157 value of enrichment 2.3 or higher in both technical repeats) representing  $20.9 \pm 5.2$  and  
158  $16.9 \pm 6.6$  viral species in each of the serum specimens in the adult and pediatric population,  
159 respectively. Enrichment profile of peptides (species wise), in relation to the number of  
160 peptides in the library (per species) are not different between adult and pediatric cohorts or  
161 between obese and lean population in adult and pediatric cohorts (Figs. S1 A-C). Principal  
162 component analysis (PCA) of enriched peptides in all serum specimens categorized by adult  
163 and pediatric, and obese and lean groups shows no qualitative difference in the enrichment  
164 profile of these 4 groups, suggesting that most peptides that were enriched, were enriched in  
165 all groups (Fig. S1 D). However, average number of enriched peptides representing certain  
166 viral species such as HSV-1, HSV-2, EBV and CMV are higher ( $p < 0.05$ ) in adult obese  
167 group compared to the lean group (Figs 1 A and B). In the pediatric population, average  
168 number of enriched peptides of all of these viral species, except EBV, is higher in the obese  
169 group than the lean group. On the other hand, average number of enriched peptides of certain  
170 species of picornaviruses are lower in the obese group compared to the lean group in the  
171 adult cohort only (Figs. 1 A and B).

172

### 173 **In-house validation of VirScan based serology data**

174        To determine the serological status of individuals as ‘positive’ or ‘negative’ for  
175 different viruses based on VirScan data, virus-specific species score thresholds determined by

176 a generalized linear model (GLM) was applied as described in the materials and methods.  
177 VirScan based serological data for CMV, EBV and HSV-1/2 were compared to that of  
178 conventional serology. Because our conventional HSV-1/2 IgG test does not differentiate  
179 between HSV-1 and -2, VirScan results for these viral species were combined. VirScan  
180 results either positive for HSV-1 or -2 or for both were all considered as HSV positive.  
181 Specimens from the pediatric cohort were simultaneously tested by VirScan and conventional  
182 serology. The sensitivity, specificity and accuracy of VirScan results compared to  
183 conventional methods are all 98% for CMV, 100%, 83% and 97% for EBV, and 89%, 91%  
184 and 90% for HSV, respectively (Table 2).

185

#### 186 **Viral seroprevalence in obese versus lean population**

187 Virome-wide serological data based on VirScan analysis were used to compare the  
188 seroprevalence of different viral species between Qatari obese and lean populations. Among  
189 the viral species that are at least 10% prevalent in either obese or lean population in the adult  
190 cohort, seroprevalences of several members of the Herpesviridae family such as HSV-1 and -  
191 2 and EBV are higher in the obese group and are positively associated with obesity with  
192 nominal  $p$ -value cut-off set at 0.05 (Figs. 2 A and B). On the other hand, seroprevalences of  
193 several members of the Picornaviridae family such as enteroviruses and rhinoviruses are  
194 lower ( $p<0.05$ ) in the obese group and are negatively associated with obesity in this cohort  
195 (Figs. 2 A and B). However, after applying the significance threshold (Bonferroni correction,  
196  $p<0.00115$ ) for multiple testing, obesity among Qatari adults are significantly associated with  
197 higher odds (OR: 3.3;  $p=2.8E-08$ ) of HSV-1 seropositivity and lower odds (OR: 0.41;  
198  $p=0.0001$ ) of rhinovirus A seropositivity. With the same adjusted  $p$ -value cut-off, no such  
199 association is observed in the pediatric population. Apart from the viral species that belong to  
200 the Herpesviridae and Picornaviridae families, the seroprevalence of rotavirus A is higher in



201 the obese groups and is nominally associated ( $p < 0.05$ ) with obesity in both cohorts. In  
202 addition, obesity is nominally associated with higher seroprevalences of human coronavirus  
203 HKU1, human adenovirus D, influenza C virus, human parainfluenza virus 1 and human  
204 parvovirus B19 in the adult cohort and higher seroprevalences of influenza A and B viruses  
205 in the pediatric cohort. Consistent with VirScan data, seroprevalences of CMV, EBV and  
206 HSV in the pediatric cohort determined by conventional serology are not significantly  
207 different in obese versus lean groups (Fig. S2).

208         The seroprevalence of HSV-1 among Qatari general population is unknown but in a  
209 previous study HSV-1 seroprevalence among Qatari male blood donors was estimated to be  
210 82.3% (19). Based on our VirScan data, the overall prevalence of HSV-1 in Qatari adult  
211 population is 74.1%, with 70.4% among the males and 76.1% among the females. The  
212 seroprevalence of HSV-1 in Qatari adult obese and lean population is 81.3% and 57.1%,  
213 respectively. Seroprevalence of HSV-1 in the pediatric population is 47%, which increased to  
214 55% by the age of 30 years, and to 90% by the age >55 years. To assess whether our results  
215 are affected by gender and age of the study participants, we used a multivariate regression  
216 model and examined the coefficients of association with adjusted beta values. The  
217 associations of age, gender and BMI status were studied with respect to adjusted virus scores.  
218 Tests for a total of 190 associations were performed with adjusted viral scores for 38 viral  
219 species (>10% prevalence) in 457 adult and 231 pediatric samples with five features (age,  
220 male, female, lean and obese). An association was considered to be significant if absolute  
221 coefficient of association ( $|\beta|$ ) was  $\geq 0.678$  and  $p$ -value was  $\leq 0.00013$  ( $-\log_{10}(p\text{val}) >$   
222 3.88). A total of 25 and 4 associations were determined to be significant for the adult and  
223 pediatric cohort, respectively (Fig. 3). While in the adult cohort, HSV-1 ( $\beta = 0.739$   
224 (95%CI=0.48-0.99);  $-\log_{10}(p\text{-value}) = 7.82$ ) and HHV7 ( $\beta = 0.745$  (95%CI=0.562-0.93);  $-\log_{10}(p\text{-value}) = 14.72$ ) are associated with obesity irrespective of age and gender, EBV is

226 associated with female obese group ( $\beta = 1.317$  (95%CI=1.05-1.5);  $-\log_{10}(\text{p-value}) = 21.93$ )  
227 and CMV is associated with male obese group ( $\beta = 0.895$  (95%CI=0.66-1.12);  $-\log_{10}(\text{p-}$   
228  $\text{value}) = 13.49$ ) only. On the other hand, rhinovirus A and B are associated with male lean  
229 group and adenovirus C is associated with female lean group only (Fig. 3A). In the pediatric  
230 cohort, no gender specific association is observed. Rhinovirus A is associated with the lean  
231 group ( $\beta = 2.07$  (95%CI=1.07-3.08);  $-\log_{10}(\text{p-value}) = 4.27$ ) and enterovirus A is associated  
232 with the obese group ( $\beta = 2.40$  (95%CI=(1.46-3.34);  $-\log_{10}(\text{p-value}) = 6.29$ ), respectively  
233 (Fig. 3B).

234

### 235 **Differentially enriched peptides in obese versus lean population**

236 We further analyzed VirScan data to determine association of different viruses with  
237 obesity at their peptide epitope levels. Distribution of peptides that are differentially enriched  
238 in adult and pediatric obese or lean population with an odds ratio of 2 (= +/- 0.693 in log  
239 scale) with significance threshold  $p=0.005$  ( $-\log(\text{p-value})=2.9$ ) are shown (Figs. 4 A and 4C).  
240 The odds ratios of the same peptides grouped by viral species with 95%CI are shown in Fig.  
241 4 B and D for the adult and pediatric population, respectively. After adjustment of  $p$ -values  
242 for multiple testing (Bonferroni correction,  $p<3.61\text{E-}06$ ), a set of peptides representing  
243 members of the HSV-1 and -2 are found differentially enriched in the adult obese group,  
244 while peptides that belong to the Picornaviridae family such as enteroviruses A-C and  
245 human rhinoviruses A and B are differentially enriched in the adult lean population. With the  
246 same significance criteria, none of the peptides show significant association with obesity in  
247 the pediatric cohort. A list of HSV-1 and -2 peptides that are significantly associated with  
248 obesity and their prevalence in obese versus lean populations are shown in Table S1. A closer  
249 look at the differentially enriched (DE) peptides that are positively associated with obesity by  
250 multiple sequence alignment of each of the DE peptides in the pediatric cohort with all DE

251 peptides in the adult cohort revealed that some peptides or potential epitopes are differentially  
252 enriched and positively associated (nominal  $p$ -value  $<0.05$ ) with obesity in both independent  
253 cohorts. Differentially enriched antigenic peptides were primarily derived from viral  
254 structural proteins, including glycoprotein G (gG) and tegument proteins of HSV (Table S2).

## 255 **Discussion**

256 Currently there is compelling epidemiological data on the association between  
257 Adenovirus-36 and obesity as well as animal data on several other viruses (7, 20-22), but a  
258 broad screen for these and other infectious causes of obesity cannot be performed without a  
259 well-established, high throughput platform for comprehensive serological profiling. The  
260 establishment of the VirScan PhIP-Seq serological profiling platform (16) has created an  
261 opportunity to investigate the association between obesity and infection at an unprecedented  
262 depth. In this study we conducted a virome-wide seroepidemiological survey with an aim to  
263 unravel associations between obesity and individual's viral exposure history. With one of the  
264 highest rates of obesity in the world, the Qatari population represents one of the best  
265 populations for this study.

266 By taking advantage of the VirScan peptide library that represents the entire human  
267 virome, and its ability to characterize individuals according to their humoral immunity, we  
268 assessed interrelationships between obesity and viral infections at both species and peptide-  
269 epitope levels. For all analyses, viral species and associated peptides that have a prevalence  
270 of under 10% in either obese or lean populations were excluded. We first looked at the  
271 distribution of enriched peptides that represent the presence of antibodies specific to those  
272 peptides in the serum samples from study subjects. We also analyzed the average number of  
273 enriched peptides per virus in the obese and lean populations in both adult and pediatric  
274 cohorts. Although the distribution of enriched peptides is not dissimilar between different  
275 group of subjects (Fig. S1), and the the average number of enriched peptides of most viral

276 species are not significantly different in the obese versus lean population, average number of  
277 enriched peptides of herpes viruses are significantly higher ( $p \leq 1.0E-05$  for HSV-1) in the  
278 obese groups compared to the lean groups. On the other hand, the average number of  
279 enriched peptides of several viral species of picornaviruses are higher in the lean population  
280 compared to the obese population in the adult cohort only. While these results suggest the  
281 presence or absence of additional features in the antibody profiles of obese individuals  
282 directed towards these viruses, in order to study the association of obesity with viral exposure  
283 history, we determined the seroprevalence of these viruses in Qatari obese and lean  
284 populations.

285         Unlike previous VirScan-based studies that applied empirically determined virus-  
286 specific species scores to determine seropositivity (16, 18), we established a generalized  
287 linear model using control serum, tittered for antibodies against different viruses, and taking  
288 into the accounts of number of peptides available in the library for each viral species. We  
289 then tested the specimens from the pediatric cohort for CMV, EBV and HSV with standard  
290 serological assays that are used for patient testing. Serological data on HSV, EBV and CMV  
291 were then used to validate the VirScan-based serological data demonstrating 90% to 98%  
292 accuracy compared to the standard methods. Based on VirScan based serology, after  
293 adjustment of  $p$ -values for multiple testing, HSV-1 seropositivity is significantly associated  
294 with obesity in the adult population only (Figs. 2 A and B). Consistently, HSV-1 is associated  
295 with obesity in the adult population independent of age and gender by multivariate regression  
296 analysis (Fig. 3A). Other herpesviruses such as HSV-2, CMV and EBV are also nominally  
297 associated with obesity, and by multivariate analysis, they are associated with obesity in a  
298 gender specific manner.

299         To obtain further insights on the relationship of herpes viruses with obesity, we  
300 analyzed the association of virus specific peptides with obesity. Consistent with our findings

301 at the species level, it is mostly the HSV-1 associated peptides that show the strongest  
302 associations with obesity (Fig. 4 A and B). Peptides from other herpes viruses are also  
303 nominally associated with obesity in the Qatari adult population. Seroprevalence of  
304 herpesviruses are not significantly different between obese and lean population in the  
305 pediatric cohort but differentially enriched, HSV-1/2 and EBV peptides are nominally  
306 associated with obesity (data not shown). We also found some HSV-1/2 peptides that are  
307 independently associated with obesity in both populations (Table S2). These results suggest  
308 that acquiring HSV-1 infection as people gets older may increase the odds of becoming  
309 obese. An early sign of this is observed by the nominal association of HSV peptides with  
310 obesity in the pediatric population. Positive association of these HSV-1/2 peptides with  
311 obesity observed in our population also correlates with earlier evidence of association  
312 between HSV and excessive adiposity in different age and gender groups. Our data on  
313 differentially enriched peptides in the adult population is consistent with the cross-sectional  
314 data from National Health and Nutrition Examination Survey (NHANES) in USA, during the  
315 period of 1999–2012, showing significantly higher prevalence of HSV-1 in both obese men  
316 and women (23). In another NHANES survey in 1999-2004, CMV was found to be  
317 significantly associated with high BMI in the female population only (ages 20-49 years).  
318 However, in our adult (>18 years) population, seropositivity to CMV was associated with  
319 obesity in the male population only.

320 In our study, obesity was not associated with human adenovirus or any of its  
321 serotypes (Adv-5, Adv-9, Adv-31, Adv-36 and Adv-37) that were previously reported to be  
322 associated with obesity, epidemiologically, or linked to enhanced lipogenesis *in vitro*,  
323 suggesting that adenoviruses may have a limited role in the incidence of high rates of obesity  
324 among Qataris. In a recent study, Lessan *et al.* demonstrated that the seroprevalence of Adv-  
325 36 in United Arab Emirates (UAE) is much higher in their population although there is no

326 significant difference in prevalence of this virus in their obese and lean populations (24). Our  
327 adenovirus data provides additional support to this finding in a highly similar population.

328

329 An incidental but interesting finding in our study is the negative association of the  
330 family of picornaviruses with obesity. This phenomenon was only observed in the adult  
331 population and may potentially be related to the waning immunity to these viruses with age.  
332 Obesity associated impaired immunity to various infections such as influenza, pneumonia,  
333 *Helicobacter pylori* and nosocomial infections or poor response to vaccines such as hepatitis  
334 B, tetanus and influenza vaccines have been described in the literature (21). However, there  
335 are no reports on impaired immunity or higher susceptibility to infections with picornaviruses  
336 such as enteroviruses and rhinoviruses in relation to obesity. Interestingly, no such  
337 association is seen in the pediatric population. This may be related to higher rates of infection  
338 with these viruses in children, and their immune systems being continuously challenged by  
339 these viruses. These findings are novel and warrant further investigations in a separate study.

340 Using a comprehensive virome-wide analysis, we identified viral species previously  
341 associated with obesity, but were unable to find novel viral associations with obesity.  
342 However, the association of different herpesviruses or their specific epitopes with obesity  
343 confirms the association of these viruses described for other populations. Furthermore,  
344 despite very high rates of obesity, no viral association studies have ever been described for  
345 the Qatari population. One limitation of our study is that VirScan results are based on  
346 antibody binding of linear epitopes only. Therefore, potential antibody interactions that relies  
347 on tertiary structure of epitopes may have been missed. Also, our clinical validation of  
348 VirScan serology data was limited to CMV, EBV and HSV only. Our study failed to provide  
349 any mechanistic insights on the role of HSV-1 infection in adipogenesis. But, for the first  
350 time, we have described high resolution, peptide-epitope level data for HSV-1 in association

351 with obesity. Our analysis of differentially enriched peptides from a large collection of  
352 peptides covering the entire human virome reveals a number of viral epitopes that could be  
353 utilized for further mechanistic studies. We have listed candidate HSV-1 and -2 peptides that  
354 were strongly correlated to obesity in the adult population and are highly prevalent in both  
355 adult and pediatric obese populations (Table S 1 and 2). Interestingly, the majority of these  
356 peptides belongs to the HSV glycoprotein family. Both HSV and CMV are known as  
357 lipogenic viruses and are known to affect cellular metabolism in different ways or are known  
358 to cause expansion of adipose tissues by their effects on inflammatory pathways (7, 10).  
359 Further studies on the role of HSV-1 candidate peptides identified in this study in cell culture  
360 or animal models may reveal novel pathways for virus induced adipogenesis.

361 In conclusion, we have conducted a virome-wide seroprevalence study to detect  
362 associations between past viral exposures and obesity in a population that is highly endemic  
363 for obesity. Our analysis revealed a strong positive association of obesity with HSV-1 and  
364 nominal associations with other herpesviruses. Our finding may have implications for  
365 understanding the underlying causes of higher prevalence of obesity not only among the  
366 Qataris but also among the citizens of other countries in the Arabian Peninsula.

367

## 368 **Materials and Methods**

### 369 **Study design and subjects**

370 For the adult cohort, 800 randomly selected serum specimens were obtained from Qatar  
371 Biobank (QBB). This cohort represents Qatari nationals and long-term residents (lived in  
372 Qatar for >15 years) aged  $\geq 18$  years. Data on age, gender, ethnicity and BMI were collected.  
373 Specimens from non-Qatari participants and specimens for which no BMI data were  
374 available were excluded from analysis. Also, specimens from subjects that fall into the  
375 overweight category (BMI >25 to <30) were excluded from the analysis. For the pediatric



376 cohort, 231 serum samples were collected from Qatari obese and lean children admitted to  
377 Sidra Medicine, which is a 400-bed tertiary care children's and women's hospital in Qatar,  
378 during the period October 2018 to November 2019. Residual specimens from comprehensive  
379 metabolic panel (CMP) and basic metabolic panel (BMP) tests were collected. Specimens  
380 from subjects that satisfies inclusion criteria were identified through laboratory information  
381 management systems (LIMS) query on a weekly basis using Discern Analytics 2.0 (Cerner).  
382 The inclusion criteria were: i) age 7-15 years ii) Qatari nationality and, iii) BMI centile 5% to  
383 85% as lean individuals or  $\geq 95\%$  as obese. Underweight (BMI centile  $<5\%$ ) or overweight  
384 (BMI centile 85% to  $<95\%$ ) children were excluded. Also, children with chronic diseases  
385 such as Cancer, Type 1 Diabetes, Immunosuppression, developmental delay and children  
386 with history or recent infections were excluded. Data on age, gender, ethnicity and BMI were  
387 collected. Specimens were aliquoted and stored at  $-80^{\circ}\text{C}$  until further tested. Ethics approval  
388 for the study was obtained from the Institutional Review Boards of Sidra Medicine and Qatar  
389 Biobank.

390

### 391 **VirScan phage immunoprecipitation sequencing (PhIP-Seq)**

392 VirScan PhIP-Seq analysis of serum specimens from the adult and pediatric cohort  
393 was carried out by the methods described previously except that an expanded bacteriophage  
394 library (containing  $2 \times 10^{10}$  plaque-forming units) displaying 115,753 peptides was used, and  
395 sequencing was performed using an Illumina NextSeq500 platform and NextSeq 500/550  
396 High Output Kit v2.5 (75 Cycles) kits (Illumina). Each specimen was tested in two technical  
397 replicates. Each sequencing batch consisted of specimens representing obese and lean  
398 subjects, mock-IP controls, positive control and input library in a random manner with an aim  
399 to minimize batch effects on the output data. PhIP-Seq analysis of a total of 688 specimens  
400 was completed in 12 NextSeq500 sequencing runs.



401

## 402 **Serological assay**

403 Serum specimens from the pediatric cohort were assessed for IgG antibody titers  
404 against CMV (n=221), EBV (n=221) and HSV-1&2 (n=219) using LIAISON® CMV IgG II,  
405 EBNA IgG and HSV-1/2 IgG assays on a LIAISON® XL automated chemiluminescence  
406 analyzer (DiaSorin) according to manufacturer's instruction and standard operating  
407 procedures (SOP) at the Serology Laboratory of Sidra Medicine. The results were interpreted  
408 as positive, negative and equivocal according to manufacturer's criteria. Equivocal results  
409 were excluded from analysis.

410

## 411 **Statistical analysis**

412 Descriptive statistics were presented as means  $\pm$  standard deviation (SD) for  
413 continuous variables or as numbers and percentages for nominal/categorical variables.  
414 VirScan data were filtered for enriched peptides as described previously (16). Briefly, we  
415 first imputed *p*-values ( $-\log_{10}$  transformed) by fitting a zero-inflated generalized Poisson  
416 model to the distribution of output counts followed by regressing the parameters for each  
417 peptide sequence based on the input read counts. Peptides with a reproducibility threshold ( $-\log_{10}(P\text{-value}) \geq 2.3$ ) in both technical repeats were further filtered for sporadic hits by  
418 removing peptides which were also significantly enriched in at-least two mock-IP controls  
419 (beads only). We also considered a peptide hit to be significant if the same peptide enriched  
420 in more than one sample. Average number of enriched peptides for different viral species  
421 were compared using *p*-values from Mann-Whitney U test for each species.

422  
423 We counted the number of non-homologous (i.e. peptides that do not share more than  
424 seven linear sequence identity), enriched peptides for each virus to evaluate virus specific  
425 scores, which has linear relation with virus peptidome size, i.e. number of available peptides

426 in the input library. To mitigate this effect, we evaluated an adjusted virus threshold score  
427 with a generalized linear model (GLM), in which we regressed the virus library size and  
428 number of enriched peptides to model virus specific cutoff from known in-house cases as  
429 described earlier (25). In brief, specimens with known IgG titers for CMV, EBV, HSV,  
430 Varicella Zoster, Mumps, Measles, Rubella, Hepatitis A, Hepatitis B, and Parvovirus B19  
431 viruses were used. We extrapolated the adjusted virus-specific scores using this model, which  
432 has been further used for seroprevalence calculations. We compared the seroprevalence at  
433 virus species level using adjusted virus score. Different group-wise comparisons were  
434 performed to compute Odds Ratios (OR) and  $p$ -values from Fisher's Exact test with  
435 Bonferroni correction for multiple testing. We considered a virus to be differentially enriched  
436 in one group if the prevalence is  $\geq 10\%$  in at least one group,  $|\log(\text{OR})| \geq \log_{10}(2)$  and  $p$ -value  
437  $\leq 0.05/n$ ; where  $n$  is the number of tests (i.e. virus species).

438 Multivariate logistic regression analysis was performed to test for associations of age,  
439 gender and BMI status with adjusted virus scores (after virus specific thresholds were  
440 applied) instead of categorical results. An adjusted  $p$ -value  $\leq 0.005/n$  and  $|\text{beta}| \geq 0.678$   
441 were applied to filter data for most significant results. Finally, differentially enriched peptides  
442 in obese versus lean populations were determined based on prevalence, OR and  $p$ -values  
443 from Fisher's Exact test, corrected for multiple testing (Bonferroni correction). Similar  
444 thresholds were applied (prevalence  $\geq 10\%$  in at least one group;  $|\log(\text{OR})| \geq \log_{10}(2)$  and  $p$ -  
445 value  $\leq 0.05/n$ ). All statistical analyses were performed using python (v.3.7) with statistical  
446 modules statsmodel (v.0.11.1) and sklearn (v.0.22).

447

## 448 **Acknowledgments**

449 We would like to thank the Qatar Biobank (QBB) management and staff, for their time and  
450 effort allowing us to access and analyze samples and data from the Qatar Biobank, and Dr.

451 Stephan Elledge (Brigham and Women's Hospital and Harvard Medical School, Boston,  
452 MA) for kindly providing the VirScan phage library used in this study.

453

454

455

456

457

## 458 **References**

- 459 1. WHO. 2017. Obesity and overweight : Fact sheet.  
460 <http://www.who.int/mediacentre/factsheets/fs311/en/>. Accessed October 02, 2017.
- 461 2. Ng M, Fleming T, Robinson M, Thomson B, Graetz N, Margono C, Mullany EC,  
462 Biryukov S, Abbafati C, Abera SF, Abraham JP, Abu-Rmeileh NM, Achoki T,  
463 AlBuhairan FS, Alemu ZA, Alfonso R, Ali MK, Ali R, Guzman NA, Ammar W,  
464 Anwari P, Banerjee A, Barquera S, Basu S, Bennett DA, Bhutta Z, Blore J, Cabral N,  
465 Nonato IC, Chang JC, Chowdhury R, Courville KJ, Criqui MH, Cundiff DK,  
466 Dabhadkar KC, Dandona L, Davis A, Dayama A, Dharmaratne SD, Ding EL, Durrani  
467 AM, Esteghamati A, Farzadfar F, Fay DF, Feigin VL, Flaxman A, Forouzanfar MH,  
468 Goto A, Green MA, Gupta R, et al. 2014. Global, regional, and national prevalence of  
469 overweight and obesity in children and adults during 1980-2013: a systematic analysis  
470 for the Global Burden of Disease Study 2013. *Lancet* 384:766-81.
- 471 3. Afshin A, Forouzanfar MH, Reitsma MB, Sur P, Estep K, Lee A, Marczak L, Mokdad  
472 AH, Moradi-Lakeh M, Naghavi M, Salama JS, Vos T, Abate KH, Abbafati C, Ahmed  
473 MB, Al-Aly Z, Alkerwi A, Al-Raddadi R, Amare AT, Amberbir A, Amegah AK,  
474 Amini E, Amrock SM, Anjana RM, Ärnlöv J, Asayesh H, Banerjee A, Barac A, Baye  
475 E, Bennett DA, Beyene AS, Biadgilign S, Biryukov S, Bjertness E, Boneya DJ,

- 476 Campos-Nonato I, Carrero JJ, Cecilio P, Cercy K, Ciobanu LG, Cornaby L, Damtew  
477 SA, Dandona L, Dandona R, Dharmaratne SD, Duncan BB, Eshrati B, Esteghamati  
478 A, Feigin VL, Fernandes JC, et al. 2017. Health Effects of Overweight and Obesity in  
479 195 Countries over 25 Years. *N Engl J Med* 377:13-27.
- 480 4. QBB. 2017. Qatar Biobank Report 2016/2017.
- 481 5. Al Kuwari H, Al Thani A, Al Marri A, Al Kaabi A, Abderrahim H, Afifi N, Qafoud  
482 F, Chan Q, Tzoulaki I, Downey P, Ward H, Murphy N, Riboli E, Elliott P. 2015. The  
483 Qatar Biobank: background and methods. *BMC Public Health* 15:1208.
- 484 6. WebMed. 2017. Obesity - Cause. [http://www.webmd.com/diet/obesity/tc/obesity-](http://www.webmd.com/diet/obesity/tc/obesity-cause)  
485 [cause](http://www.webmd.com/diet/obesity/tc/obesity-cause). Accessed October 02, 2017.
- 486 7. Voss JD, Dhurandhar NV. 2017. Viral Infections and Obesity. *Curr Obes Rep* 6:28-  
487 37.
- 488 8. Dhurandhar NV. 2001. Infectobesity: obesity of infectious origin. *J Nutr* 131:2794S-  
489 2797S.
- 490 9. Voss JD, Atkinson RL, Dhurandhar NV. 2015. Role of adenoviruses in obesity. *Rev*  
491 *Med Virol* 25:379-87.
- 492 10. Sanchez EL, Lagunoff M. 2015. Viral activation of cellular metabolism. *Virology*  
493 479-480:609-18.
- 494 11. Cheng J, Ke Q, Jin Z, Wang H, Kocher O, Morgan JP, Zhang J, Crumpacker CS.  
495 2009. Cytomegalovirus infection causes an increase of arterial blood pressure. *PLoS*  
496 *Pathog* 5:e1000427.
- 497 12. Hamer M, Batty GD, Kivimaki M. 2016. Obesity, Metabolic Health, and History of  
498 Cytomegalovirus Infection in the General Population. *J Clin Endocrinol Metab*  
499 101:1680-5.

- 500 13. Al-Thani A, Baris M, Al-Lawati N, Al-Dhahry S. 2013. Characterising the aetiology  
501 of severe acute gastroenteritis among patients visiting a hospital in Qatar using real-  
502 time polymerase chain reaction. *BMC Infect Dis* 13:329.
- 503 14. Horton KC, Dueger EL, Kandeel A, Abdallat M, El-Kholy A, Al-Awaidy S, Kohlani  
504 AH, Amer H, El-Khal AL, Said M, House B, Pimentel G, Talaat M. 2017. Viral  
505 etiology, seasonality and severity of hospitalized patients with severe acute  
506 respiratory infections in the Eastern Mediterranean Region, 2007-2014. *PLoS One*  
507 12:e0180954.
- 508 15. Ponterio E, Gnessi L. 2015. Adenovirus 36 and Obesity: An Overview. *Viruses*  
509 7:3719-40.
- 510 16. Xu GJ, Kula T, Xu Q, Li MZ, Vernon SD, Ndung'u T, Ruxrungtham K, Sanchez J,  
511 Brander C, Chung RT, O'Connor KC, Walker B, Larman HB, Elledge SJ. 2015. Viral  
512 immunology. Comprehensive serological profiling of human populations using a  
513 synthetic human virome. *Science* 348:aaa0698.
- 514 17. Mina MJ, Kula T, Leng Y, Li M, de Vries RD, Knip M, Siljander H, Rewers M, Choy  
515 DF, Wilson MS, Larman HB, Nelson AN, Griffin DE, de Swart RL, Elledge SJ. 2019.  
516 Measles virus infection diminishes preexisting antibodies that offer protection from  
517 other pathogens. *Science* 366:599-606.
- 518 18. Isnard P, Kula T, Avettand Fenoel V, Anglicheau D, Terzi F, Legendre C, Elledge SJ,  
519 Canaud G. 2019. Temporal virus serological profiling of kidney graft recipients using  
520 VirScan. *Proc Natl Acad Sci U S A* 116:10899-10904.
- 521 19. Nasrallah GK, Dargham SR, Mohammed LI, Abu-Raddad LJ. 2018. Estimating  
522 seroprevalence of herpes simplex virus type 1 among different Middle East and North  
523 African male populations residing in Qatar. *J Med Virol* 90:184-190.

- 524 20. Hegde V, Dhurandhar NV. 2013. Microbes and obesity--interrelationship between  
525 infection, adipose tissue and the immune system. *Clin Microbiol Infect* 19:314-20.
- 526 21. Hainer V, Zamrazilová H, Kunešová M, Bendlová B, Aldhoon-Hainerová I. 2015.  
527 Obesity and infection: reciprocal causality. *Physiol Res* 64 Suppl 2:S105-19.
- 528 22. Xu MY, Cao B, Wang DF, Guo JH, Chen KL, Shi M, Yin J, Lu QB. 2015. Human  
529 Adenovirus 36 Infection Increased the Risk of Obesity: A Meta-Analysis Update.  
530 *Medicine (Baltimore)* 94:e2357.
- 531 23. Liu SH, Tzeng IS, Hsieh TH, Huang YC. 2016. Associations between excessive  
532 adiposity and seroprevalence of herpes simplex virus type 1 and type 2 among US  
533 adults: a population-based age-period-cohort analysis. *BMJ Open* 6:e012571.
- 534 24. Lessan N, Saradalekshmi KR, Alkaf B, Majeed M, Barakat MT, Lee ZPL, Atkinson  
535 RL. 2020. Obesity and Diabetes in an Arab population: Role of Adenovirus 36  
536 Infection. *Sci Rep* 10:8107.
- 537 25. Kerner G, Rosain J, Guerin A, Al-Khabaz A, Oleaga-Quintas C, Rapaport F, Massaad  
538 MJ, Ding JY, Khan T, Ali FA, Rahman M, Deswarte C, Martinez-Barricarte R, Geha  
539 RS, Jeanne-Julien V, Garcia D, Chi CY, Yang R, Roynard M, Fleckenstein B,  
540 Rozenberg F, Boisson-Dupuis S, Ku CL, Seeleuthner Y, Beziat V, Marr N, Abel L,  
541 Al-Herz W, Casanova JL, Bustamante J. 2020. Inherited human IFN-gamma  
542 deficiency underlies mycobacterial disease. *J Clin Invest* 130:3158-3171.
- 543
- 544
- 545
- 546
- 547
- 548

549

550

551

552

553

554

555

## 556 **Figure legends**

557

558 **Figure 1: Antibody responses to viral peptides in obese versus lean populations.** Peptides  
559 that were immunoprecipitated by antibodies present in the serums specimens and passed the  
560 significance and reproducibility thresholds for enrichment were counted per virus per  
561 specimen. Bar plots showing standard error mean (SEM) of the enriched peptide number for  
562 the most prevalent viruses (>10%) between the lean and obese groups of the adult (A) and  
563 pediatric (B) cohort. \* $p < 0.05$ , \*\* $p < 0.01$ , \*\*\* $p < 0.001$  by Mann Whitney's U test.

564

565 **Figure 2: Viral seroprevalence and association with obesity.** Seropositivity to a virus was  
566 determined based on adjusted species score ( $\geq 1$ ) or total number of enriched peptides per  
567 virus normalized with the virus-specific threshold. Bar plots and forest plots show data for  
568 viruses that are at least 10% prevalent in either obese or lean or both populations and are  
569 nominally ( $p \leq 0.05$  from Fisher's Exact Test) positively or negatively associated with obesity.  
570 Comparison of viral seroprevalence in obese and lean population in the (A) adult cohort and  
571 (C) the pediatric cohort. \*\*\*Viruses that passed significance threshold after Bonferroni  
572 correction ( $p \leq 0.00115$ ). Viral association with obesity shown by log(odds ratio) with 95% CI  
573 in the (A) adult cohort and (C) the pediatric cohort.

574

575 **Figure 3: Viral association with obesity in a multivariate regression model adjusted for**

576 **age and gender.** The associations of age, gender and BMI status with adjusted virus scores.

577 Heatmaps showing coefficients of association with adjusted beta values for (A) the adult

578 cohort and (B) the pediatric cohort.

579

580 **Figure 4: Viral peptides differentially enriched in the obese populations.** Enriched

581 peptides of the VirScan phage display library that were positively or negatively associated

582 with obesity with a minimum odds ratio of 2 (= +/- 0.693 in log scale) with significance

583 threshold i.e. 0.005 (= 2.9 for  $-\text{Log}(p\text{-value})$ ) are plotted. Volcano plots showing the

584 distribution of differentially enriched peptides based on their OR and p-values in (A) the

585 adult population and the (B) pediatric population. Violin plots showing the differentially

586 enriched peptides grouped under viral species with their OR and 95%CI. \*\*\*Peptides that

587 passed significance threshold after Bonferroni correction ( $p < 3.61\text{E-}06$ ).

588

589

590

591

592

593

594

595

596

597

598



599

600

601

602

603

604

605 **Table 1: Description of the study population**

606

| <b>Characteristics</b>         | <b>All</b>  | <b>Lean</b><br>(BMI≤25 or Centile<br>5%-85%) | <b>Obese</b><br>(BMI≥30 or Centile<br>≥95%) |
|--------------------------------|-------------|----------------------------------------------|---------------------------------------------|
| <i><b>Adult cohort</b></i>     |             |                                              |                                             |
| No. [n(%)]                     | 457 (100%)  | 184 (40.3%)                                  | 273 (59.7%)                                 |
| Age (mean±sd)                  | 40.2±13.2   | 33.5±12.1                                    | 44.7±11.9                                   |
| Gender                         |             |                                              |                                             |
| Male [n (%)]                   | 128 (28.0%) | 51 (11.2%)                                   | 77 (16.8%)                                  |
| Female [n (%)]                 | 329 (72.0%) | 133 (29.1%)                                  | 196 (42.9%)                                 |
| BMI (mean±sd)                  | 28.9 ± 6.04 | 21.86 ± 2.45                                 | 34.96 ± 4.3                                 |
| <i><b>Pediatric cohort</b></i> |             |                                              |                                             |
| No.                            | 231         | 111                                          | 120                                         |
| Age (mean±sd)                  | 11.7±2.2    | 11.2±2.4                                     | 12±2                                        |
| Gender                         |             |                                              |                                             |
| Male [n (%)]                   | 114 (48.9%) | 46 (41.4%)                                   | 68 (56.7%)                                  |
| Female [n (%)]                 | 119 (51.1%) | 65 (58.6%)                                   | 52 (43.3%)                                  |

|                   |           |           |        |
|-------------------|-----------|-----------|--------|
| Centile (mean±sd) | 73.5±31.2 | 46.7±25.7 | 98±1.2 |
|-------------------|-----------|-----------|--------|

607

608

609

610

611

612

613 **Table 2: Performance characteristics of VirScan PhIP-Seq method for serological**

614 **detection of CMV, EBV and HSV compared to standard methods**

615

| <b>Statistic</b>       | <b>CMV</b>   | <b>EBV</b>    | <b>HSV-1/2</b> |
|------------------------|--------------|---------------|----------------|
| True positive          | 137          | 163           | 106            |
| False positive         | 2            | 7             | 9              |
| False negative         | 3            | 0             | 13             |
| True negative          | 79           | 34            | 90             |
| Sensitivity, %(95% CI) | 98%(94-100%) | 100%(98-100%) | 89%(82-94%)    |
| Specificity, %(95% CI) | 98%(92-100%) | 83%(68-93%)   | 91%(83-96%)    |
| Accuracy, %(95% CI)    | 98%(95-99%)  | 97%(93-99%)   | 90%(85-94%)    |

616

617

618

619

620

621

622

623

624

625

626

627

628

629

# Figure 1

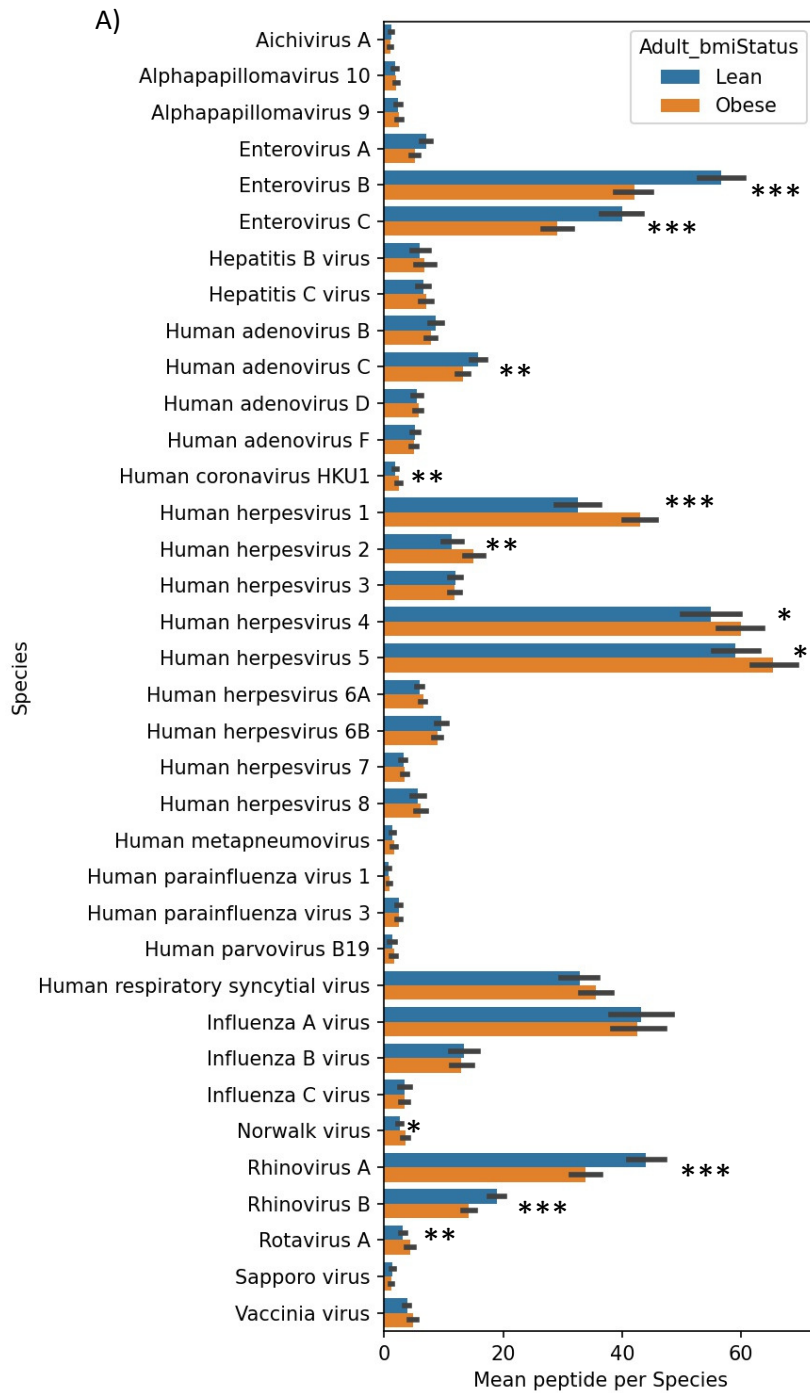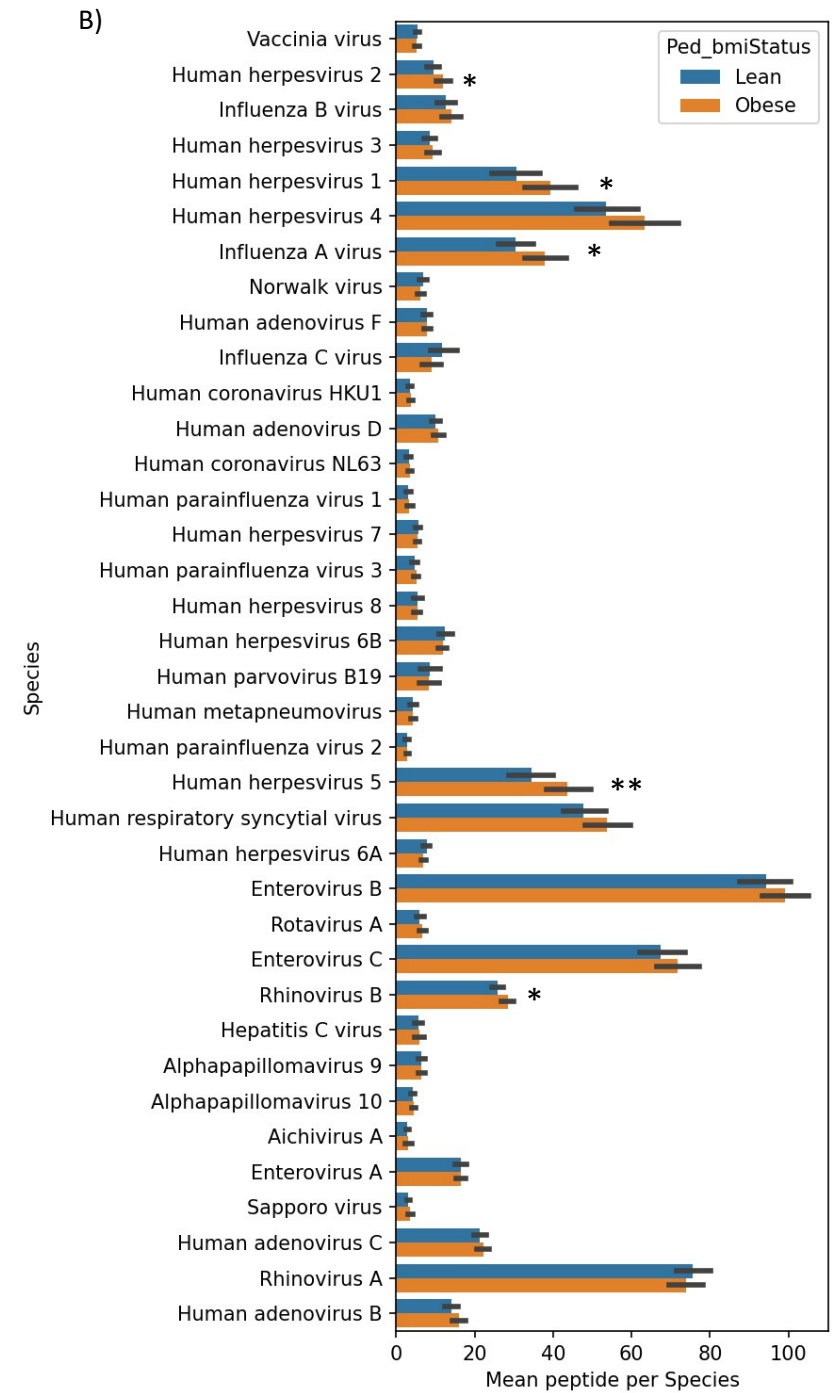

Figure 2

A) Virus Species Prevalence in selected cohort

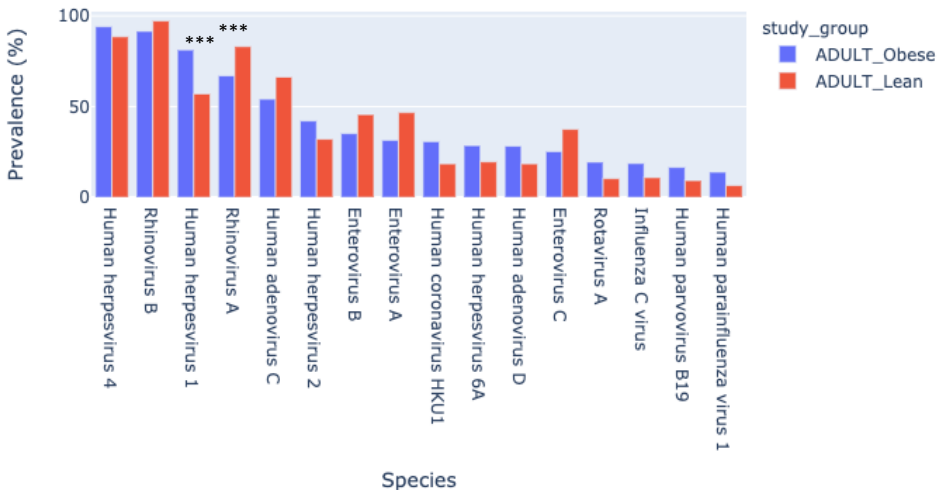

B) Log(OddsRatio) with 95% CI

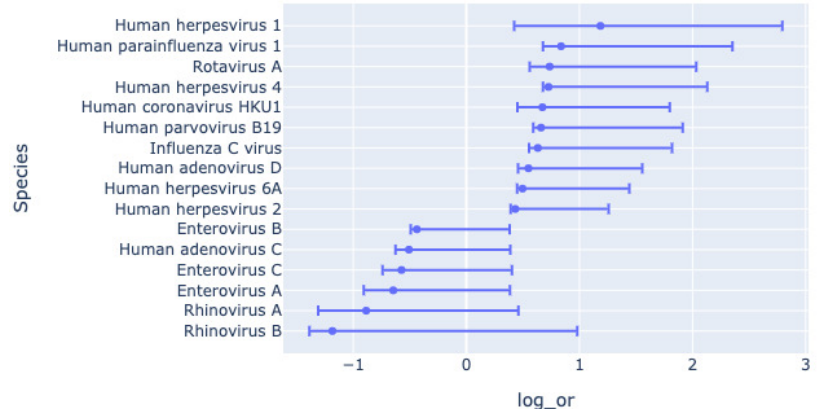

C) Virus Species Prevalence in selected cohort

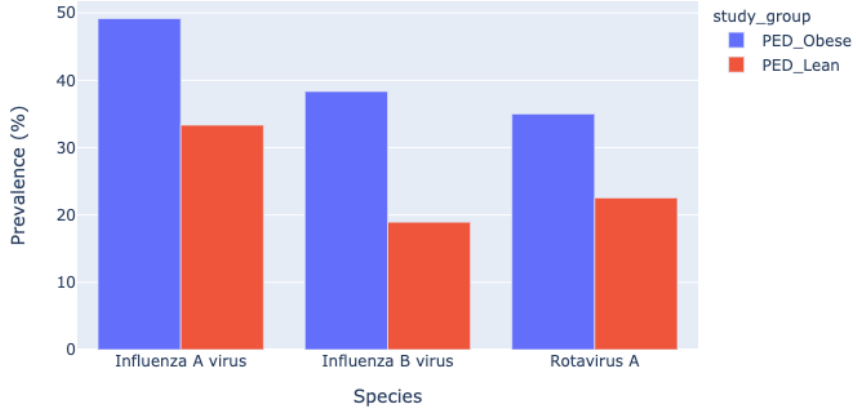

D) Log(OddsRatio) with 95% CI

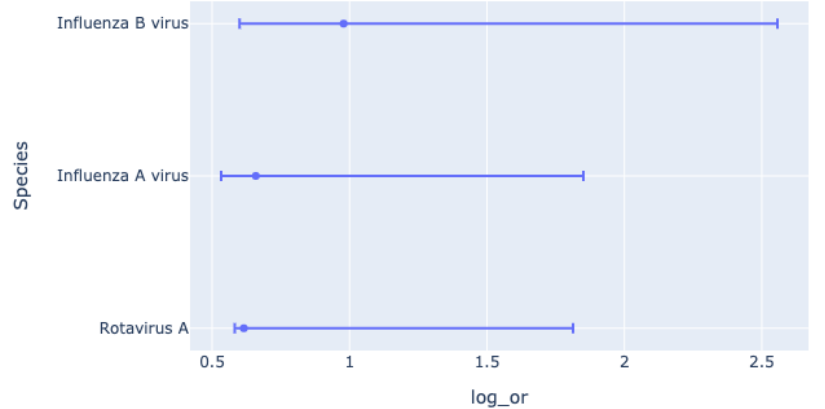

Figure 3

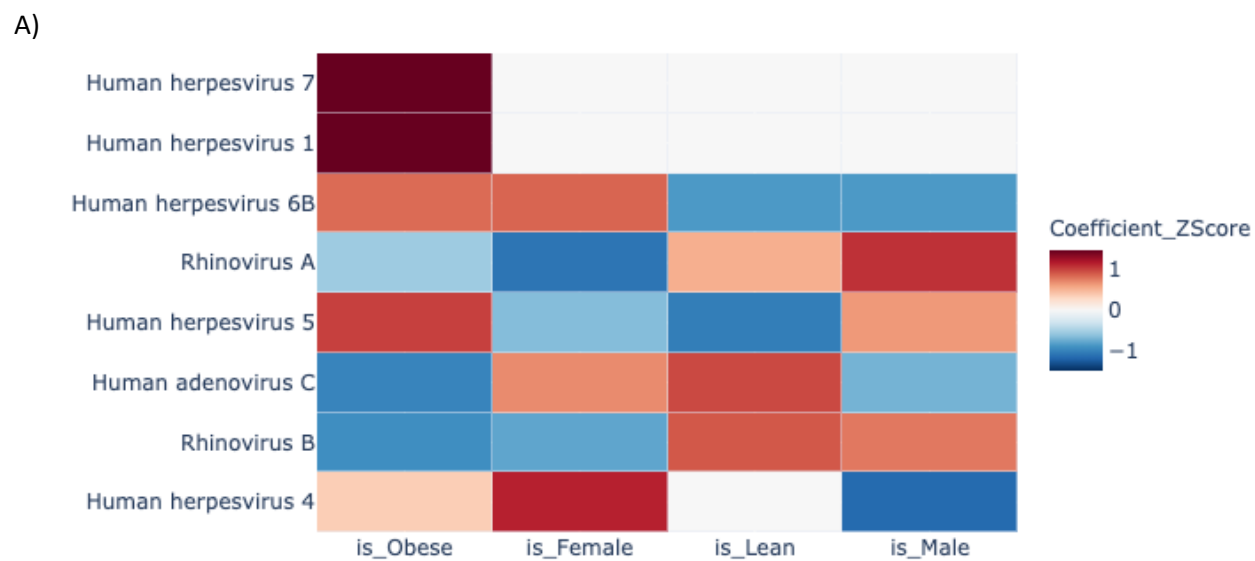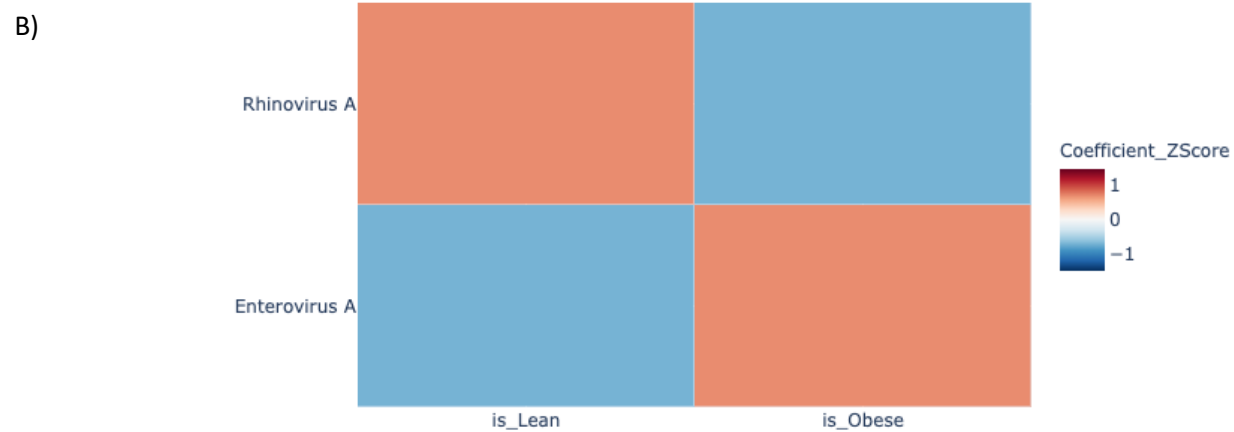

Figure 4

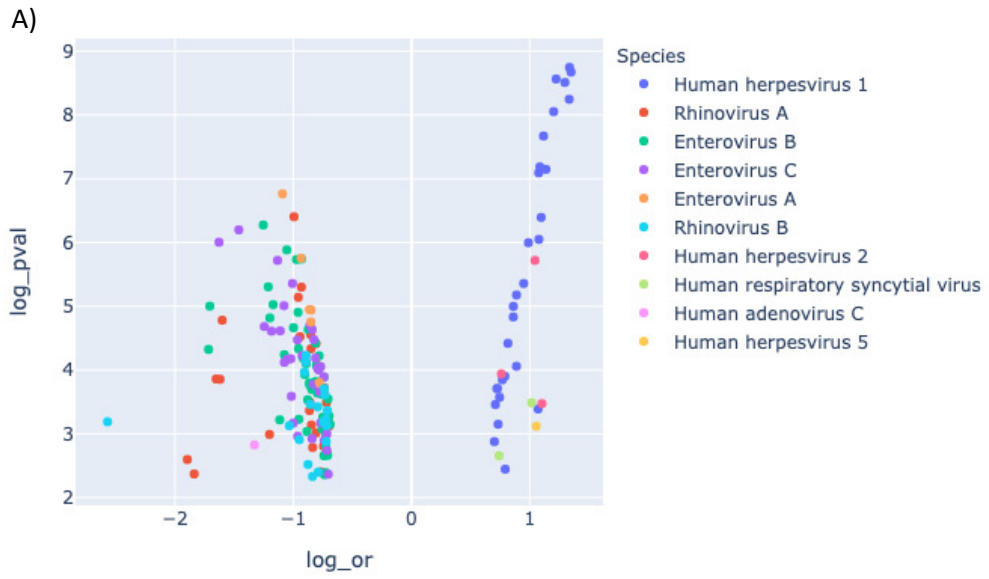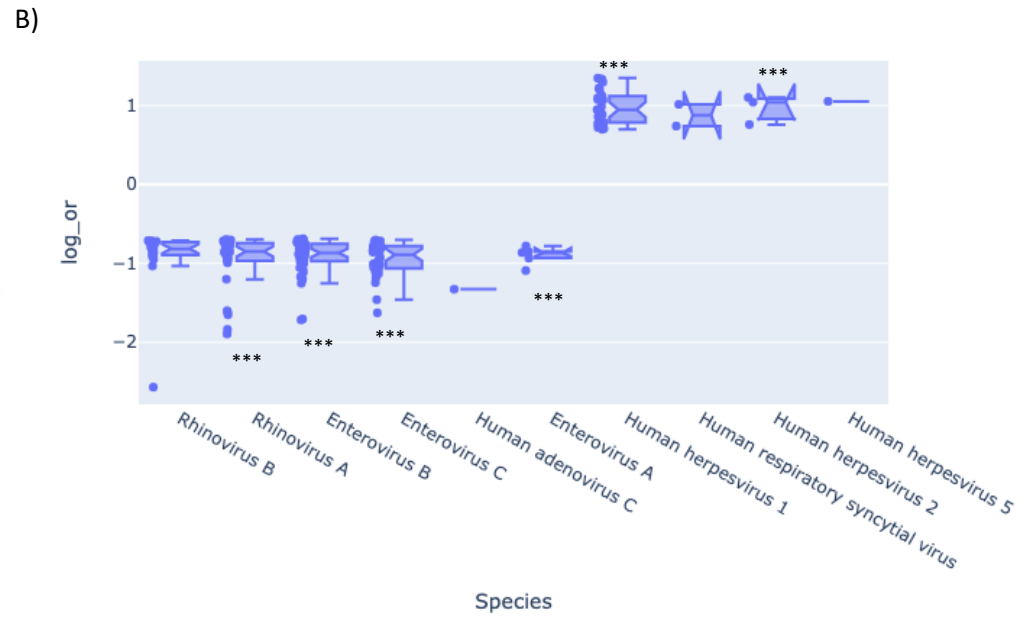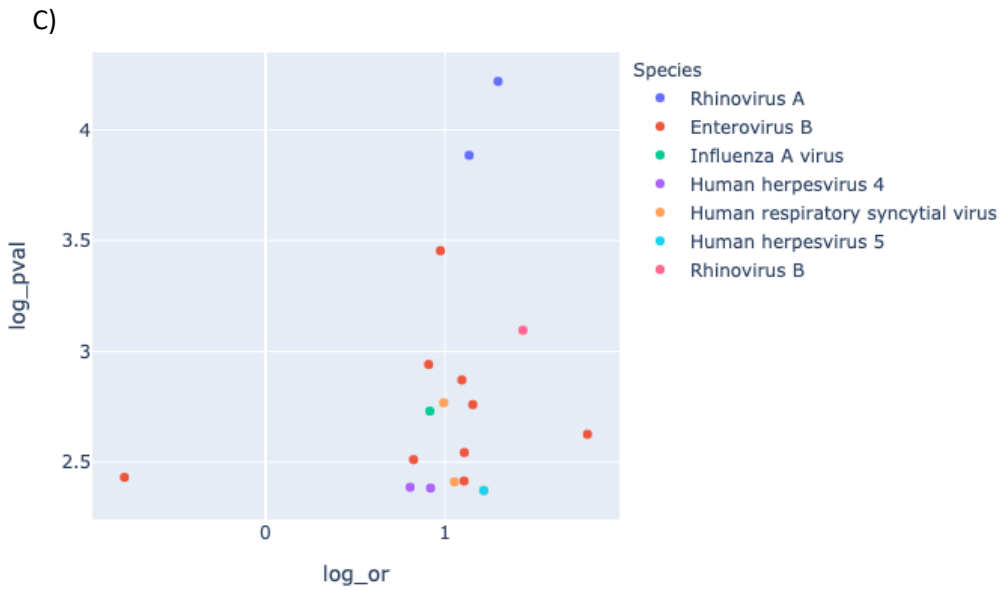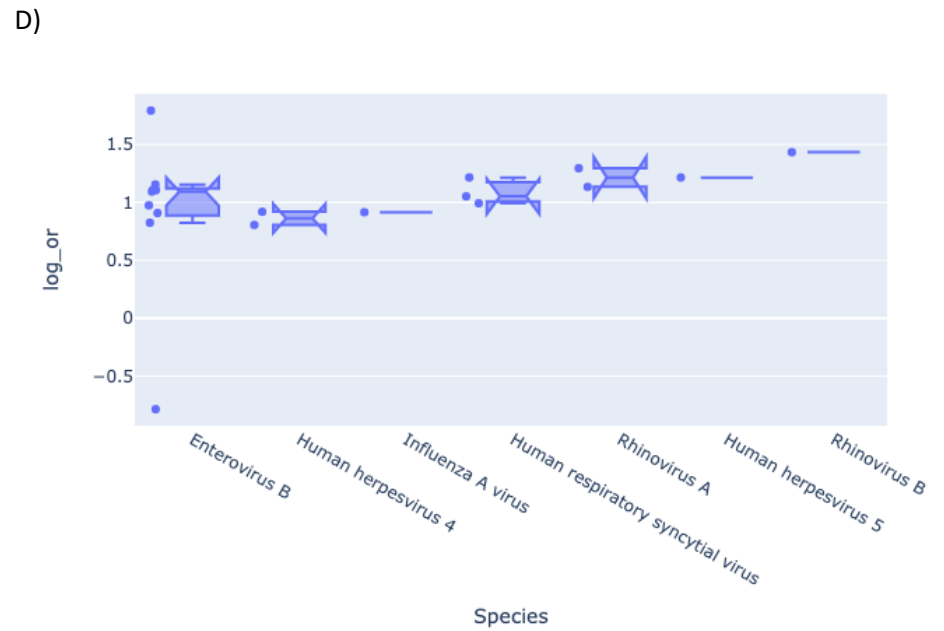

Source: https://biorxiv.org/content/10.1101/2020.09.02.280503v1.full.pdf
